# Supplementary material
Source: Springer Nature journal article supplement (https://www.springermedizin.de/resource/supplementary/12876_2014_1125_MOESM1_ESM.pdf/9438526)
Supplement: MOESM1 [file 9438526]

| Study                                                  | Subjects                                                                  | Serological screening for CD                               | Anthropometrics at CDx                                                                                                                                                                                       | Anthropometrics at follow up (FU).                                                                                                                                                                                                 | Diabetes management and glycaemic control                                                                                                                                             | Compliance to GFD                                   | Comments                                                                           |
|--------------------------------------------------------|---------------------------------------------------------------------------|------------------------------------------------------------|--------------------------------------------------------------------------------------------------------------------------------------------------------------------------------------------------------------|------------------------------------------------------------------------------------------------------------------------------------------------------------------------------------------------------------------------------------|---------------------------------------------------------------------------------------------------------------------------------------------------------------------------------------|-----------------------------------------------------|------------------------------------------------------------------------------------|
| [1]<br>Germany;<br>Multicentre,<br>retrospective study | 41,951 T1DM<br>(0.1 to 20y);<br>411<br>T1DM+CD.                           | Variable<br>(EMA and<br>tTg)                               | T1DM+CD weight SDS and height SDS lower than T1DM (0.20 vs 0.43, p<0.001 and -0.28 vs -0.03, p<0.01). BMI SDS ns.                                                                                            | 5y FU weight SDS lower in T1DM+CD than T1DM (0.23±0.93 vs 0.43±0.90, p<0.02). Height SDS lower (0.08±10.07 vs 0.15±0.95, p<0.05). BMI SDS ns.                                                                                      | HbA1c (%) levels at CDx or post CDx ns between groups. T1DM+CD: HbA1c (%) levels ns at CDx and FU. T1DM+CD vs T1DM: N° hypo ns                                                        |                                                     |                                                                                    |
| [2]<br>USA; Cross-sectional,<br>prospective            | 71 T1DM with<br>tTg +ve and<br>63 tTg -ve<br>T1DM<br>controls.<br>(2-18y) | Routine<br>screening for<br>IgA tTg                        | tTg +ve: weight SDS lower than tTg -ve (0.25±0.12 vs 0.65±0.14, p=0.03), BMI and height SDS ns.                                                                                                              | Weight SDS lower in tTg +ve group than tTg -ve at 1y and 2y FU (0.27±0.12 vs 0.67±14, p=0.4 and 0.18±0.12 vs 0.66±0.15, p=0.01). At 2y FU BMI SDS was lower in tTg +ve group than tTg -ve group (0.28±0.17 vs 1.07±0.20, p=0.003). | CDx: IR lower in tTg +ve than tTg -ve group (0.08±0.1 vs 1.2±0.2, p=0.03). HbA1c (%) levels and the No hypo ns in tTg +ve on a GFD and those on a regular diet at CDx, 12m or 24m FU. | Adherence to a GFD was suboptimal                   | Baseline height, weight and BMI SDS not low.                                       |
| [3]<br>Ireland;<br>Retrospective<br>study, 2000-2007   | 468 T1DM, 33<br>+ve serology.<br>23 CD biopsy<br>+ve.                     | Annual<br>Screening<br>(AGA and<br>EMA, tTg<br>after 2002) |                                                                                                                                                                                                              | Weight SDS, BMI SDS and height SDS ns 12m before or after CDx.                                                                                                                                                                     | T1DM+CD: N° hypo lower at CDx-1y than CDx+1y (9% vs 36, p<0.07). IR higher at CDx+1y than CDx-1y (0.88±0.33 vs 1.1±0.29 units/kg/day, p<0.005). HbA1c (%) CDx +/-1y ns.               | Serological compliance limited.                     | No matched controls.                                                               |
| [4]<br>UK; Cross-sectional<br>Multicentre              | 49<br>T1DM+CD.<br>Matched<br>T1DM<br>controls.                            | Annual<br>screening,<br>AGA, EMA,<br>and tTg               | T1DM+CD vs T1DM:<br>Weight, height and BMI<br>SDS ns.                                                                                                                                                        | Weight, height and BMI SDS ns.                                                                                                                                                                                                     | T1DM+CD: HbA1c (%) lower than T1DM (8.4±1.3% vs 8.7±1.5%, p=0.01) at CDx. HbA1c (%) increase after CDx (p=0.04). T1DM+CD vs T1DM IR ns.                                               |                                                     | HbA1c increase post CDx, may indicate intestinal recovery                          |
| [5]<br>USA; Prospective,<br>Cross-sectional            | 35 biopsy CD.<br>(2-18y)<br>Matched to 63<br>T1DM tTg -<br>ve T1DM.       | Routine<br>screening for<br>IgA tTg                        | T1DM+CD lower BMI SDS than T1DM (0.36±0.87 vs 0.68±0.67, p=0.05). Height, weight SDS ns. tTg +ve: weight and BMI SDS lower than tTg -ve (0.29±1.0 vs 0.68±0.84, p=0.024 and 0.34±0.9 vs 0.75±0.76, p=0.005). |                                                                                                                                                                                                                                    | T1DM+CD vs T1DM: HbA1c (%) and IR at CDx ns. Between CDx and CDx-2y ns.                                                                                                               |                                                     | Only 20% of tTg +ve patients were on GFD for varying durations may affect results. |
| [6]<br>Denmark;<br>Prospective                         | 269 T1DM<br>(9.4y)<br>(28/269<br>biopsy CD)                               | Study entry<br>only, no<br>prior<br>screening.             | Weight SDS and height SDS lower in T1DM+CD than T1DM (0.1 vs 0.5, p=0.002), (-0.65 vs 0.4, p<0.001).                                                                                                         | T1DM+CD weight SDS increased from CDx to 12, 18 and 24m (p=0.002), Height SDS increase from CDx to 24m (p=0.073), excluding >14yrs (p=0.036).                                                                                      | T1DM+CD: HbA1c levels at CDx compared post CDx ns (p=0.3).                                                                                                                            | tTg measured. Compliance not classified or assessed | Significant lower height at CDx may be due to lack of screening in this population |

|                                                                |                                                                                             |                                                                   |                                                                                                                                   |                                                                                                                                                                                            |                                                                                                                                                                                                   |                                                                                       |                                            |
|----------------------------------------------------------------|---------------------------------------------------------------------------------------------|-------------------------------------------------------------------|-----------------------------------------------------------------------------------------------------------------------------------|--------------------------------------------------------------------------------------------------------------------------------------------------------------------------------------------|---------------------------------------------------------------------------------------------------------------------------------------------------------------------------------------------------|---------------------------------------------------------------------------------------|--------------------------------------------|
| [7]<br>Austria/Hungary;<br>Multicentre<br>prospective          | 98 T1DM with<br>+ve EMA, 74<br>T1DM+<br>biopsy CD.<br>195 T1DM<br>controls.<br>Paediatrics. | Annual<br>screening,<br>EMA.                                      | T1DM+CD vs T1DM: BMI<br>SDS ns.                                                                                                   | T1DM+CD vs T1DM: BMI<br>SDS, height SDS and weight<br>SDS ns. BMI SDS: higher in<br>compliant than non-compliant,<br>in boys (p<0.02), in girls<br>(p<0.01) in one year. Height<br>SDS ns. | T1DM+CD vs T1DM: IR and N <sup>o</sup><br>hypo ns.                                                                                                                                                | EMA yearly. 33<br>compliant (EMA-<br>ve), 25 non-<br>compliant<br>(EMA+ve).           |                                            |
| [8]<br>Germany;<br>Prospective                                 | 12<br>T1DM+CD.<br>(1.4-25y).                                                                | Study only;<br>IgA, AGA,<br>EmA                                   |                                                                                                                                   | Compliant: T1DM+CD height<br>SDS increase at FU (p=0.03),<br>non-compliant ns                                                                                                              | HbA1c (%) lower in compliant than<br>non-compliant T1DM+CD at CDx<br>(8.0±0.5% vs 7.3±0.7%, p=0.05).                                                                                              | Clinical<br>assessment and<br>serology. 5/9<br>compliant                              | No controls.<br>Small number.              |
| [9]<br>Australia;<br>Prospective                               | 21<br>T1DM+CD,<br>42 matched<br>T1DM(1.6-<br>12.9y).                                        | No<br>screening.<br>Patients<br>identified<br>when<br>symptomatic | T1DM+CD vs T1DM:<br>weight SDS, height SDS and<br>BMI SDS ns,                                                                     | T1DM+CD: CDx to<br>CDx+12m: weight SDS<br>increase (0.43±1.27 to<br>0.76±1.27, p=0.049), BMI<br>SDS increase (0.44±1.16 to<br>0.76±0.89, p=0.015). Height<br>SDS ns.                       | CDx: IR lower in T1DM+CD than<br>T1DM (Mean difference -0.24 (-0.48,<br>0.005), p=0.054). IR increased in<br>FU. T1DM+CD vs T1DM: HbA1c<br>(%) ns at CDx and FU.                                  | One telephone<br>questionnaire to<br>establish<br>adherence (taken<br>3-112 m in FU). | No blood<br>markers of CD<br>activity.     |
| [10]<br>Germany +<br>Austria;<br>Multicentre,<br>retrospective | 127<br>T1DM+CD.<br>18,470 T1DM<br>and 1,199<br>T1DM+ CD                                     | Variable<br>between<br>centres.                                   | T1DM+CD lower height<br>SDS than T1DM (-0.49±1.1<br>vs -0.06±1.0, p<0.001) and<br>lower BMI SDS (0.2±0.8 vs<br>0.5±0.9, p<0.001). | T1DM+CD vs T1DM height<br>SDS ns. Children <11yrs<br>contributed most to lost in<br>height of T1DM+CD.                                                                                     | T1DM+CD vs T1DM: IR and N <sup>o</sup> of<br>IR ns. HbA1c (%) lower in<br>T1DM+CD than T1DM (8.1±1.85%<br>vs 8.8±2.45%, p<0.001) at CDx +<br>FU.                                                  | No                                                                                    | Patients not<br>matched for<br>age at CDx. |
| [11]<br>Italy; Retrospective                                   | 434 T1DM,<br>21/434<br>T1DM+CD.<br>(1.8-22yrs).                                             | Annual IgA,<br>IgG EMA<br>and AGA.                                | T1DM+CD vs T1DM:<br>height SDS, weight SDS and<br>BMI SDS ns.                                                                     | T1DM+CD vs T1DM: height<br>SDS, weight SDS and BMI<br>SDS ns.                                                                                                                              | T1DM+CD vs T1DM: increased No<br>hypo from prior to CDx vs post CDx<br>(4.5±4 vs 2±2.2 episodes/m. p=0.01).<br>IR decreased from CDx-18m to CDx<br>(0.6±0.2 vs 0.9±0.3, p=0.05). HbA1c<br>(%) ns. | EMA/AGA,<br>Compliance not<br>classified or<br>assessed.                              |                                            |
| [12]<br>Australia;<br>Retrospective                            | 20<br>T1DM+CD,<br>20 matched<br>T1DM<br>controls<br>(<18y).                                 | Annual<br>screening                                               | T1DM+CD vs T1DM:<br>height SDS weight SDS and<br>BMI SDS ns.                                                                      | T1DM+CD vs T1DM: height<br>SDS, weight SDS and BMI<br>SDS ns. T1DM+CD: weight<br>SDS increase from CDx to FU<br>(-0.12±0.67 vs 0.20±0.84,<br>p<0.05).                                      | T1DM+CD: HbA1c (%) associated<br>with compliance ns.                                                                                                                                              | Assessed by<br>dietary records.<br>IgA AGA for<br>12/20.                              | Sub groups of<br>compliance<br>very small. |

Type one Diabetes Mellitus (T1DM), Coeliac Disease (CD), Type 1 diabetes Mellitus and coeliac disease (T1DM+CD), Coeliac disease diagnosis (CDx), Gluten Free Diet (GFD), Glycosylated Haemoglobin A1c (HbA1c), Tissue transglutaminase (tTg), Standard Deviation Score (SDS), Mean Difference (MD) with 95% confidence intervals in (), Immunoglobulin A (IgA), Immunoglobulin G (IgG), IGA and IgG gliadin antibodies (AGA), IgA endomysium antibodies (EmA). Follow up (FU), Non-significant difference (ns). Insulin Requirement (IR), Hypoglycaemic episodes (hypo), year (y), months (m)

## References for supplementary Table 1

1. Frohlich-Reiterer EE, Kaspers S, Hofer S, Schober E, Kordonouri O, Pozza SB, Holl RW: **Anthropometry, metabolic control, and follow-up in children and adolescents with type 1 diabetes mellitus and biopsy-proven celiac disease.** *JPediatr* 2011, **158**(4):589-593.
2. Simmons JH, Klingensmith GJ, McFann K, Rewers M, Ide LM, Taki I, Liu E, Hoffenberg EJ: **Celiac autoimmunity in children with type 1 diabetes: a two-year follow-up.** *JPediatr* 2011, **158**(2):276-281.
3. Abid N, McGlone O, Cardwell C, McCallion W, Carson D: **Clinical and metabolic effects of gluten free diet in children with type 1 diabetes and coeliac disease.** *PediatrDiabetes* 2011, **12**(4 Pt 1):322-325.
4. Sun S, Puttha R, Ghezaiel S, Skae M, Cooper C, Amin R: **The effect of biopsy-positive silent coeliac disease and treatment with a gluten-free diet on growth and glycaemic control in children with Type 1 diabetes.** *DiabetMed* 2009, **26**(12):1250-1254.
5. Simmons JH, Klingensmith GJ, McFann K, Rewers M, Taylor J, Emery LM, Taki I, Vanyi S, Liu E, Hoffenberg EJ: **Impact of celiac autoimmunity on children with type 1 diabetes.** *JPediatr* 2007, **150**(5):461-466.
6. Hansen D, Brock-Jacobsen B, Lund E, Bjorn C, Hansen LP, Nielsen C, Fenger C, Lillevang ST, Husby S: **Clinical benefit of a gluten-free diet in type 1 diabetic children with screening-detected celiac disease - A population-based screening study with 2 years' follow-up.** *Diabetes Care* 2006, **29**(11):2452-2456.
7. Rami B, Sumnik Z, Schober E, Waldhor T, Battelino T, Bratanic N, Kurti K, Lebl J, Limbert C, Madacsy L *et al*: **Screening detected celiac disease in children with type 1 diabetes mellitus: Effect on the clinical course - (A case control study).** *Journal of Pediatric Gastroenterology and Nutrition* 2005, **41**(3):317-321.
8. Sanchez-Albisua I, Wolf J, Neu A, Geiger H, Wascher I, Stern M: **Coeliac disease in children with Type 1 diabetes mellitus: the effect of the gluten-free diet.** *DiabetMed* 2005, **22**(8):1079-1082.
9. Saadah OI, Zacharin M, O'Callaghan A, Oliver MR, Catto-Smith AG: **Effect of gluten-free diet and adherence on growth and diabetic control in diabetics with coeliac disease.** *ArchDisChild* 2004, **89**(9):871-876.
10. Kaspers S, Kordonouri O, Schober E, Grabert M, Hauffa BP, Holl RW: **Anthropometry, metabolic control, and thyroid autoimmunity in type 1 diabetes with celiac disease: A multicenter survey.** *JPediatr* 2004, **145**(6):790-795.
11. Mohn A, Cerruto M, Iafusco D, Prisco F, Tumini S, Stoppoloni O, Chiarelli F: **Celiac disease in children and adolescents with type I diabetes: importance of hypoglycemia.** *JPediatrGastroenterolNutr* 2001, **32**(1):37-40.
12. Westman E, Ambler GR, Royle M, Peat J, Chan A: **Children with coeliac disease and insulin dependent diabetes mellitus - Growth, diabetes control and dietary intake.** *Journal of Pediatric Endocrinology & Metabolism* 1999, **12**(3):433-442.
